# Supplementary material for: Ultra‐Small Fatty Acid‐Stabilized Magnetite Nanocolloids Synthesized by In Situ Hydrolytic Precipitation
Source: Hindawi journal article supplement (doi:10.1155/2015/620672), 2015-01-01
Supplement: f1 [file 620672.f1.pdf]

### Synthesis conducted in the presence of OA without HA

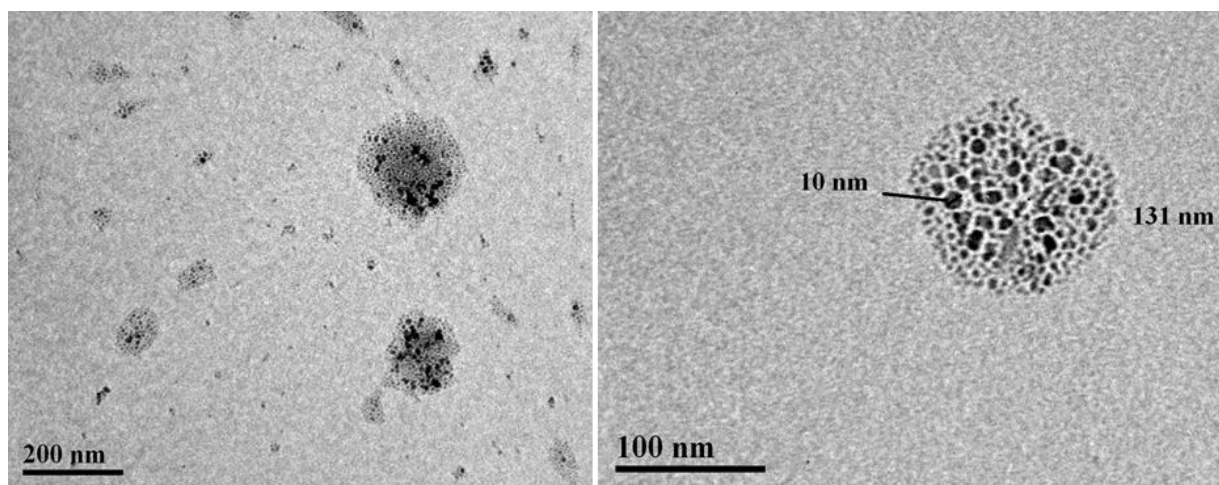

**Figure S1.** TEM images of Fe<sub>3</sub>O<sub>4</sub> NPs prepared in the presence of OA, without the addition of HA.

**Table S1.** DLS of different fatty acid-stabilized NPs\*

| Sample                       | Diameter (nm) |
|------------------------------|---------------|
| Lauric acid-stabilized NPs   | 155 ± 7.18    |
| Palmitic acid-stabilized NPs | 119 ± 3.98    |
| Stearic acid-stabilized NPs  | 125 ± 5.45    |

\*Synthesis was conducted without the addition of HA

## Preparation of various doped ferrite metal oxides

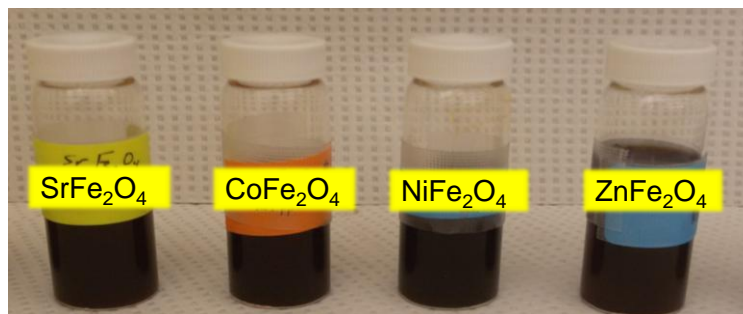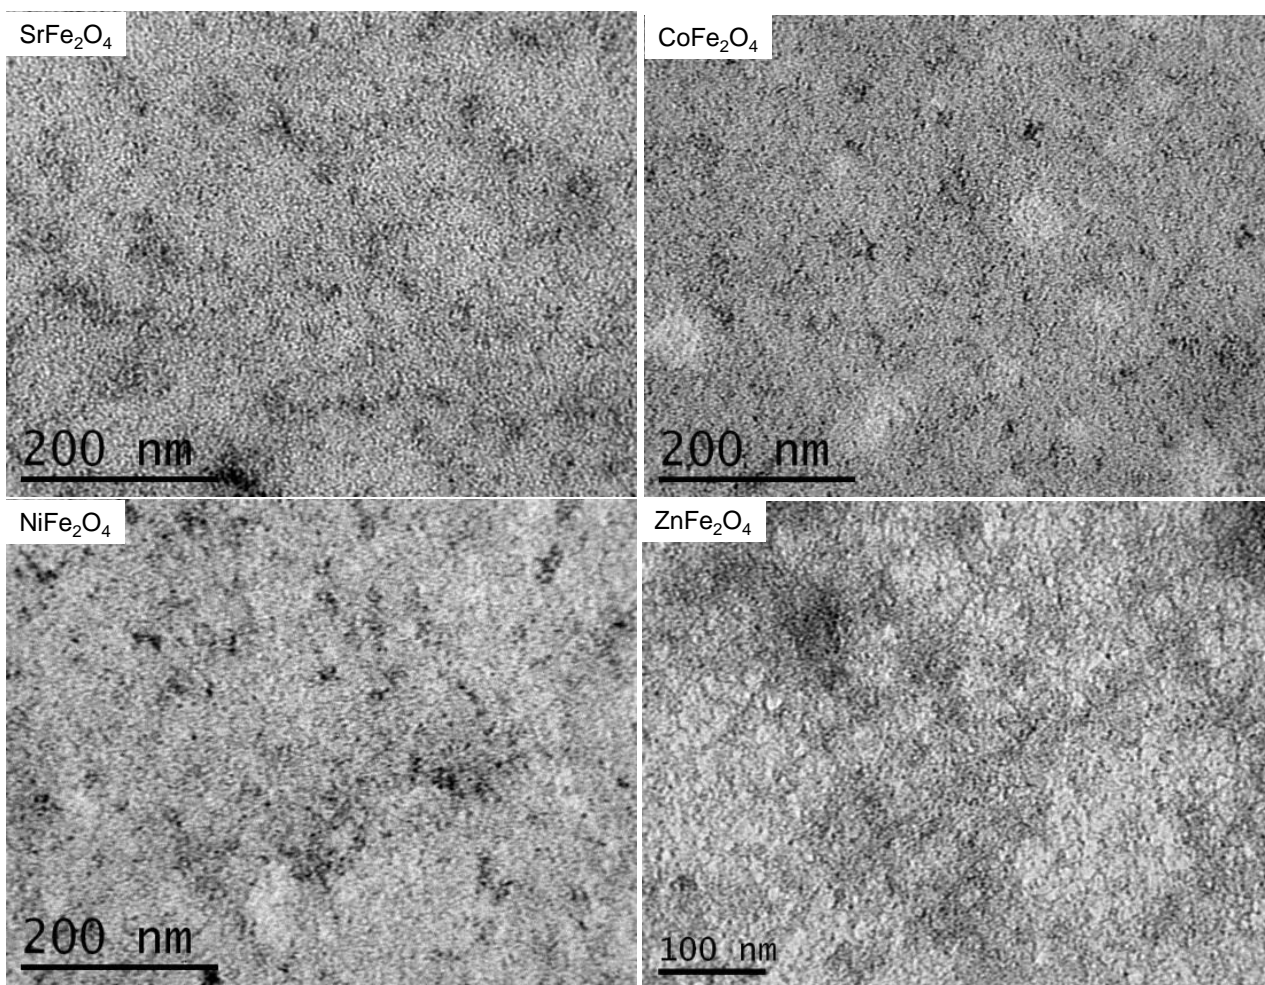

**Figure S2.** TEM images along with photographs showing the successful preparation of ~ 2 nm OA-stabilized colloidal doped ferrite metal oxides  $\text{MFe}_2\text{O}_4$  ( $\text{M} = \text{Sr}, \text{Co}, \text{Ni}, \text{and Zn}$ ) dispersed in hexane. Experimentally, same procedure was followed using the corresponding metal (II) chloride salts instead of the  $\text{Fe(II)}$  precursor. The as-synthesized particles were stable for months without evident precipitation. This confirms the simplicity and generality of our approach.

## Characterization of PVP-stabilized $\text{Fe}_3\text{O}_4$ NPs

### Dynamic Light Scattering (DLS)

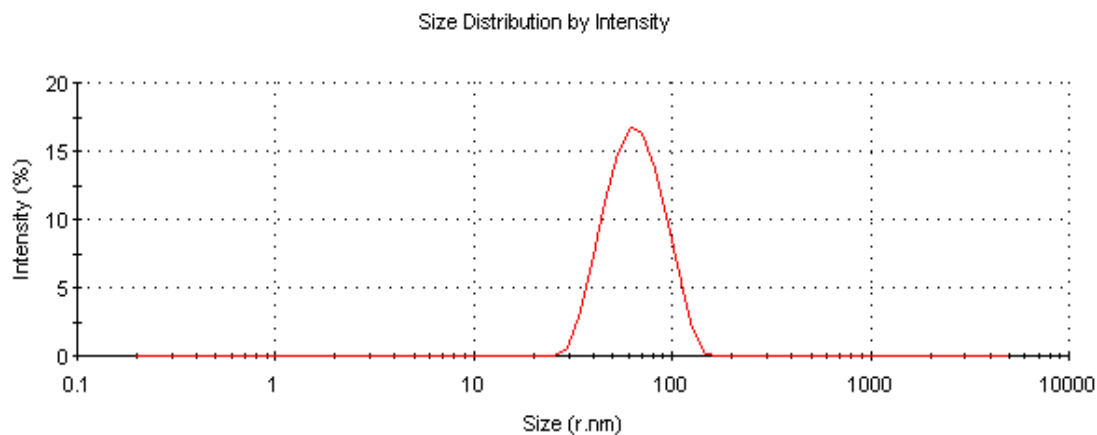

**Figure S3.** Representative DLS for PVP-stabilized  $\text{Fe}_3\text{O}_4$   $\text{M}^3\text{NPs}$  ( $56 \pm 5.05$  nm). Three independent measurements were conducted.

### Fourier Transform Infrared Spectroscopy (FTIR)

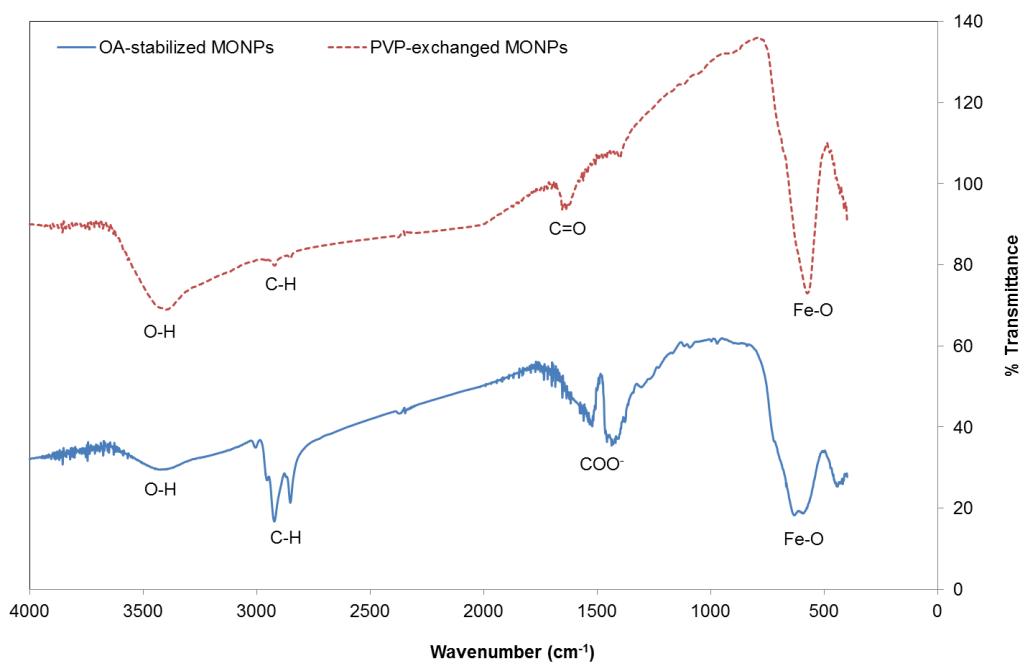

**Figure S4.** FTIR spectra for OA-stabilized  $\text{Fe}_3\text{O}_4$   $\text{M}^3\text{NPs}$  (blue), and PVP-stabilized  $\text{Fe}_3\text{O}_4$   $\text{M}^3\text{NPs}$  after the ligand exchange (red). The spectra clearly shows that the intensity of the characteristic vibrational modes ascribed to OA molecules dramatically decreased after PVPylation, with a shift in the vibrational band from 1517 to 1660  $\text{cm}^{-1}$  belonging to C=O group of PVP.

## Thermogravimetric Analysis (TGA)

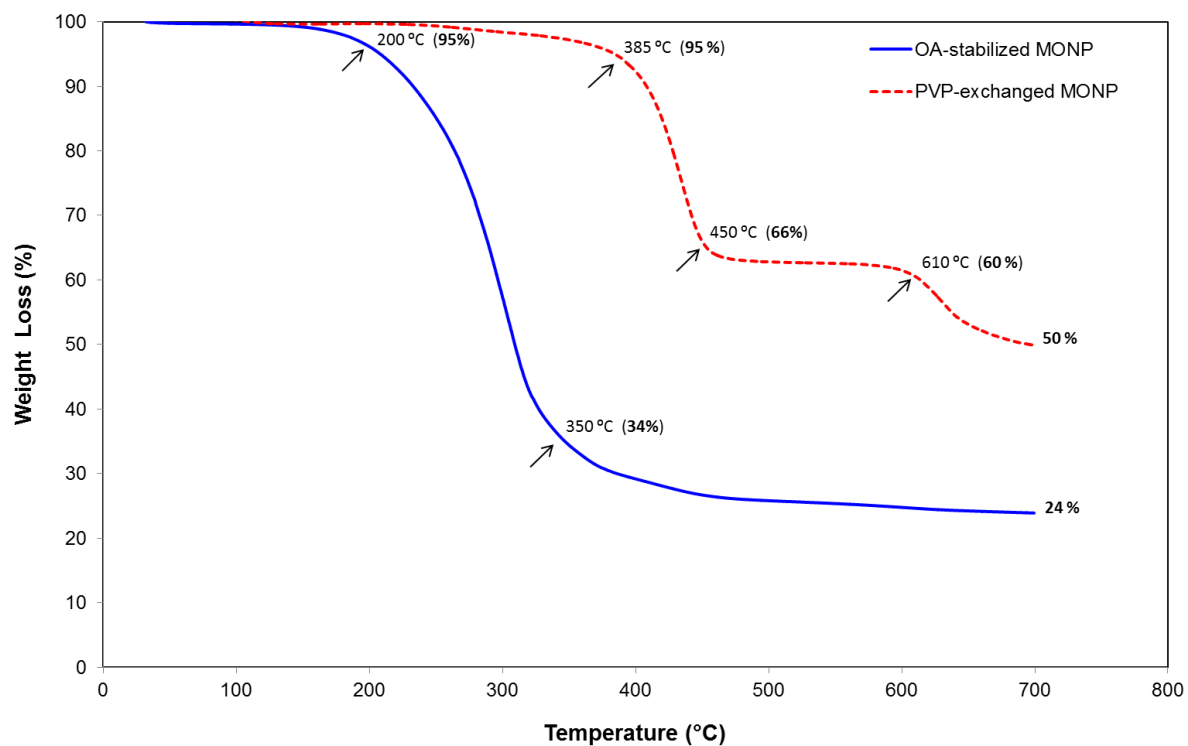

**Figure S5.** TGA curves for OA-stabilized  $\text{Fe}_3\text{O}_4$   $\text{M}^3\text{NPs}$  (blue), and PVP-stabilized  $\text{Fe}_3\text{O}_4$   $\text{M}^3\text{NPs}$  after the ligand exchange (red).
